# Supplementary material
Source: Springer Nature journal article supplement (https://www.springermedizin.de/resource/supplementary/13075_2010_3127_MOESM4_ESM.pdf/9693818)

Placebo - Control

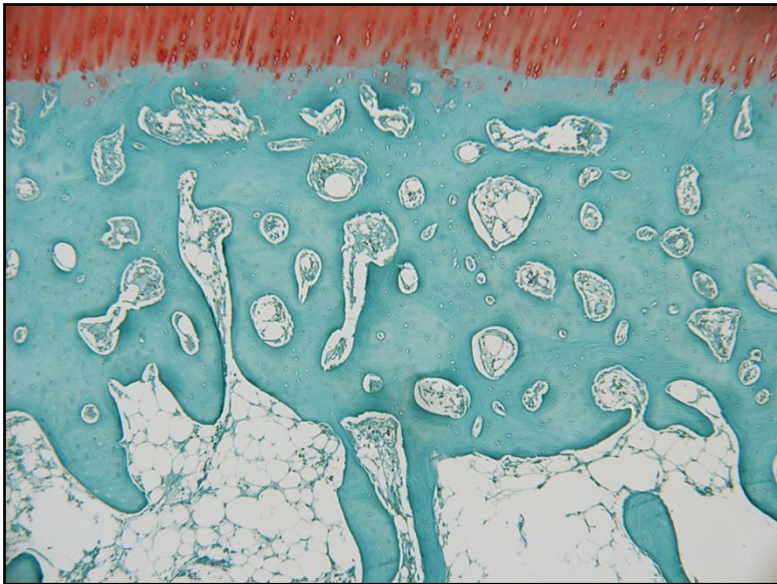

Tiludronate 2 mg/kg

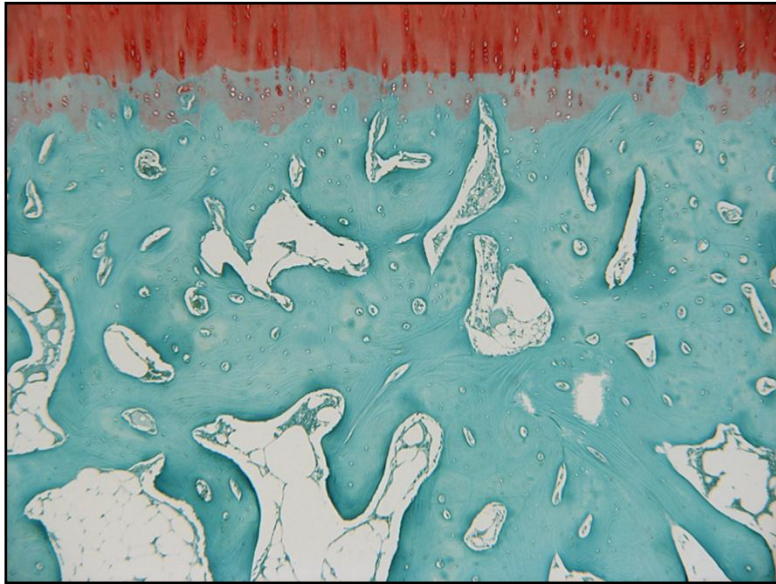

**Cartilage**  
**Calcified**  
**cartilage**

**Subchondral**  
**bone**

Supplement: MOESM4 [file 9693818]
